# Supplementary material
Source: PubMed Central journal article supplement (PMC4354880)
Supplement: NIHMS648856-supplement-2.pdf [file NIHMS648856-supplement-2.pdf]

## SUPPLEMENTAL MATERIAL

### Supplementary Methods

#### RAAS measurements

##### Measurements of renin and aldosterone

In FHS, KORA and SUVIMAX, blood samples were taken in the early morning from seated participants after an overnight fast. In PREVEND, fasting blood samples were taken between 8 AM and 4 PM. In SHIP, blood was drawn throughout the day (between 8 AM and 8 PM) in non-fasting participants while they were taking their regular medication. Serum and plasma were stored at  $-80^{\circ}\text{C}$  in all cohorts. Aldosterone measurements were available in all cohorts (FHS Gen 2 and Gen 3, KORA, SHIP, SUVIMAX, PREVEND; **Figure 1**); plasma renin concentrations were measured in the FHS Gen 2, KORA, SHIP and PREVEND samples; plasma renin activity was determined in the FHS Gen 3 and SUVIMAX samples (**Figure 1**). Details on the methods to determine RAAS biomarkers in the different samples are provided below.

In **FHS**, plasma renin concentration (Gen 2) and serum aldosterone concentrations were determined with an immunochemi-luminometric assay (Nichols assay, Quest Diagnostics, Cambridge, Mass) and a radioimmunoassay (Quest Diagnostics), respectively.<sup>1</sup> The mean interassay coefficients of variation were 10.0% (low concentration) and 2.0% (high concentrations) for renin and 9.8% (low concentrations) and 4.0% (high concentrations) for aldosterone.<sup>1</sup> Plasma renin activity (ng/mL/hr; in Gen 3) was determined using the GammaCoat Plasma Renin Activity RIA Kit (DiaSorin) with an interassay coefficient of variation of 12.6%.<sup>2</sup>

In **KORA**, plasma aldosterone concentrations and plasma renin concentrations were measured in EDTA plasma. Specifically, plasma aldosterone concentrations were determined after

extraction by an immunofluorescence in-house assay, as detailed elsewhere.<sup>3</sup> Interassay coefficients of variation were 15.2% (low concentrations) and 8% (high concentrations).<sup>4</sup> The plasma renin concentration was determined by an automated chemiluminescence immunoassay (LIAISON Direct Renin, DiaSorin).<sup>5</sup> The interassay coefficient of variation was 12.2%.<sup>6</sup>

In **SHIP**, plasma renin concentration was measured using a radioimmunoassay (Renin III generation, Cisbio Bioassay, Bagnols-sur-Cèze Cedex, France). Interassay coefficients of variation were 5.0% (low concentrations) and 4.0% (high concentrations), respectively.<sup>7</sup> The standards in the kits were calibrated against the international reference preparation (WHO 68 / 356).<sup>7</sup>

Plasma aldosterone concentration was measured using a radioimmunoassay (Coat-A-Count Aldosterone, Siemens Healthcare Diagnostics, Eschborn, Germany). Interassay coefficients of variation were 15.7% (low concentrations) and 3.8% (high concentrations), respectively.

In **SUVIMAX**, plasma renin activity was measured using an in-house assay, as described previously,<sup>8</sup> with interassay coefficients of variation of 31% (low concentrations) and 25% (high concentrations). Aldosterone was determined using a radioimmunoassay with <sup>125</sup>I-aldosterone (Coat-A-Count Aldosterone, Diagnostic Products Corporation). The interassay coefficients of variation were 15% (low concentrations) and 10% (high concentrations).

In **PREVEND**, plasma renin concentrations were determined by an automated chemiluminescence immunoassay (LIAISON Direct Renin, DiaSorin).<sup>5,9</sup> Plasma aldosterone concentrations were measured with an ELISA kit (Alpco, Salem, NH, USA).<sup>9</sup> The interassay coefficients of variation were 10.9% for renin<sup>9</sup> and 9.6% for aldosterone.<sup>9</sup>

## Genotyping details

In **FHS**, from a total of 534,982 genotyped SNPs (Affymetrix 500K and MIPS 50K combined), 378,163 SNPs were used in the imputation after filtering out 15,586 SNPs (Hardy-Weinberg  $p < 1e-6$ ), 6,4511 SNPs (missingness  $> 0.03$ ), 4,5361 SNPs (mishap  $p < 1e-9$ ), 4,857 SNPs ( $> 100$  Mendel errors), 6,7269 SNPs (frequency  $< 0.01$ ), 2 SNPs (due to strandedness issues upon merging data with HapMap), and a further 1,3394 SNPs (as they were not present on HapMap). MACH (version 1.0.15) was used to impute all 2,543,887 SNPs on HapMap, using the publicly available phased haplotypes from HapMap (release 22, build 26, CEU population) as a reference panel.

The **KORA F4 samples** were genotyped with the Affymetrix Human SNP Array 6.0. Hybridization of genomic DNA was done in accordance with the manufacturer's standard recommendations. Genotypes were determined using Birdseed2 clustering algorithm. For quality control purposes, we applied a positive control and a negative control DNA every 96 samples. On chip level only subjects with overall genotyping efficiencies of at least 93% were included resulting in an average genotyping efficiency of 98% per chip. In addition the called sex had to agree with the sex in the KORA study database. Imputation of genotypes was performed with the software IMPUTE v0.4.2 based on HapMap II.

The **SHIP** samples were genotyped using the Affymetrix Human SNP Array 6.0. Hybridisation of genomic DNA was done in accordance with the manufacturer's standard recommendations. The genetic data analysis workflow was created using the Software InforSense. Genetic data were stored using the database Caché (InterSystems). Genotypes were determined using the Birdseed2 clustering algorithm. For quality control purposes, several control samples were

added. On the chip level, only subjects with a genotyping rate on QC probesets (QC callrate) of at least 86% were included. Finally, all arrays had a sample call rate > 92%. The overall genotyping efficiency of the GWA was 98.55%. Imputation of genotypes in SHIP was performed with the software IMPUTE v0.5.0 based on HapMap II.

The **SUVIMAX sample** was genotyped using the Illumina 317K array. Genotypes were called using the Beadstudio algorithm. A sample call rate  $\geq 95\%$ , a minor allele frequency  $\geq 1\%$  and a Hardy-Weinberg equilibrium p-value  $\geq 10^{-6}$  were required. Imputation of genotypes was performed with the software IMPUTE.

The **PREVEND** sample was genotyped using the Illumina Human CytoSNP array. SNPs with a minor allele frequency below 1%, a call rate below 95% or a Hardy-Weinberg equilibrium p-value  $< 10^{-6}$  were excluded. Genotypes were called with the GenomeStudio algorithm.

Imputation of genotypes in PREVEND was done using the BEAGLE software.

## **Funding**

**FHS:** This work was supported by the National Heart, Lung, and Blood Institute's Framingham Heart Study (Contract No. N01-HC-25195) and its contract with Affymetrix, Inc for genotyping services (Contract No. N02-HL-6-4278), and by grants from the National Heart, Lung, and Blood Institute 2K24HL04334, RO1HL080124, RO1HL077477, and RO1HL093328 (all to Dr Vasan), R01-HL-086875 (to Dr. Wang).

**KORA:** The KORA research platform (KORA, Cooperative Health Research in the Region of Augsburg) was initiated and financed by the Helmholtz Zentrum München - German Research Center for Environmental Health, which is funded by the German Federal Ministry of Education

and Research and by the State of Bavaria. M.R. is recipient of a grant by the Else Kröner-Fresenius Stiftung for the German Conn-Registry.

**Study of Health in Pomerania (SHIP):** SHIP is part of the Community Medicine Research net of the University of Greifswald, Germany, which is funded by the Federal Ministry of Education and Research (grants no. 01ZZ9603, 01ZZ0103, and 01ZZ0403), the Ministry of Cultural Affairs as well as the Social Ministry of the Federal State of Mecklenburg-West Pomerania, and the network 'Greifswald Approach to Individualized Medicine (GANI\_MED)' funded by the Federal Ministry of Education and Research (grant 03IS2061A). Genome-wide data have been supported by the Federal Ministry of Education and Research (grant no. 03ZIK012) and a joint grant from Siemens Healthcare, Erlangen, Germany and the Federal State of Mecklenburg- West Pomerania. The University of Greifswald is a member of the 'Center of Knowledge Interchange' program of the Siemens AG and the Caché Campus program of the InterSystems GmbH.

**SUVIMAX:** This study was funded by the Association Robert Debré pour la Recherche Médicale, the Institut National pour la Santé et la Recherche Médicale, the Conservatoire National des Arts et Métiers, the Institut National de la Recherche Agronomique and the Université Paris 13.

**PREVEND:** PREVEND genetics is supported by the Dutch Kidney Foundation (Grant E033), the EU (grant LSHM-CT 2006-037697, GENECURE), the National Institutes of Health (grant LM010098), The Netherlands Organisation for Health Research and Development (NWO VENI grant 916.761.70), and the Dutch Interuniversity Cardiology Institute Netherlands (ICIN); the renin and aldosterone assays were supported by grants from the Netherlands Heart Foundation (grant 2007T046) and The Netherlands Organisation for Health Research and Development (NWO VENI grant 916.10.117).

**Jackson Heart Study:** The Jackson Heart Study is supported by contracts HHSN268201300046C, HHSN268201300047C, HHSN268201300048C, HHSN268201300049C, HHSN268201300050C from the National Heart, Lung, and Blood Institute and the National Institute on Minority Health and Health Disparities.

## Supplementary Tables

**Supplementary Table 1.** Association of top plasma renin activity SNPs with plasma renin concentration (PRC) in the discovery cohorts (FHS, KORA, SHIP)

### FHS

| SNP-ID     | Chromosome | Position  | Trait | Coded allele | Beta     | SE       | P-value  | N    | Imputed | Oevar_imp |
|------------|------------|-----------|-------|--------------|----------|----------|----------|------|---------|-----------|
| rs12374220 | 4          | 183677641 | PRC   | T            | -0.10627 | 0.068231 | 0.119338 | 3103 | Yes     | 0.620956  |
| rs5030062  | 3          | 187936874 | PRC   | C            | 0.016785 | 0.025657 | 0.512973 | 3103 | Yes     | 1.010671  |
| rs4253311  | 4          | 187411677 | PRC   | A            | -0.03595 | 0.025317 | 0.155642 | 3103 | Yes     | 1.001227  |

### KORA

| SNP-ID     | Chromosome | Position  | Trait | Coded allele | Beta     | SE       | P-value  | N    | Imputed | Oevar_imp |
|------------|------------|-----------|-------|--------------|----------|----------|----------|------|---------|-----------|
| rs12374220 | 4          | 183677641 | PRC   | T            | 0.02587  | 0.075007 | 0.730196 | 1704 | Yes     | 0.877704  |
| rs5030062  | 3          | 187936874 | PRC   | C            | -0.02036 | 0.038499 | 0.597169 | 1658 | Yes     | 0.968982  |
| rs4253311  | 4          | 187411677 | PRC   | G            | 0.005742 | 0.036517 | 0.875898 | 1782 | Yes     | 0.996428  |

### SHIP

| SNP-ID     | Chromosome | Position  | Trait | Coded allele | Beta     | SE       | P-value  | N    | Imputed | Oevar_imp |
|------------|------------|-----------|-------|--------------|----------|----------|----------|------|---------|-----------|
| rs12374220 | 4          | 183677641 | PRC   | T            | 0.019226 | 0.053    | 0.716842 | 3125 | Yes     | 0.864969  |
| rs5030062  | 3          | 187936874 | PRC   | C            | 0.019734 | 0.023968 | 0.410681 | 3123 | Yes     | 0.957087  |
| rs4253311  | 4          | 187411677 | PRC   | G            | 0.038588 | 0.022507 | 0.086393 | 3122 | Yes     | 0.996274  |

FHS, Framingham Heart Study; KORA, Cooperative Health Research in the Region of Augsburg; SHIP, Study of Health in Pomerania  
SE, standard error; oevar\_imp, observed divided by expected variance for imputed allele dosage

**Supplementary Table 2.** Association of top plasma renin activity SNPs with aldosterone concentrations in the discovery cohorts (FHS, KORA, SHIP, SUVIMAX)

**FHS**

| SNP-ID     | Chromosome | Position  | Trait | Coded allele | Beta     | SE       | P-value  | N    | Imputed | Oevar_imp |
|------------|------------|-----------|-------|--------------|----------|----------|----------|------|---------|-----------|
| rs12374220 | 4          | 183677641 | Aldo  | T            | 0.10192  | 1.393061 | 0.941676 | 6884 | Yes     | 0.620956  |
| rs5030062  | 3          | 187936874 | Aldo  | C            | 0.380553 | 1.393061 | 0.784717 | 6884 | Yes     | 1.010671  |
| rs4253311  | 4          | 187411677 | Aldo  | A            | 1.327637 | 1.393061 | 0.340572 | 6884 | Yes     | 1.001227  |

**KORA**

| SNP-ID     | Chromosome | Position  | Trait | Coded allele | Beta     | SE       | P-value         | N    | Imputed | Oevar_imp |
|------------|------------|-----------|-------|--------------|----------|----------|-----------------|------|---------|-----------|
| rs12374220 | 4          | 183677641 | Aldo  | T            | 0.001014 | 0.044538 | 0.981819        | 1709 | Yes     | 0.888954  |
| rs5030062  | 3          | 187936874 | Aldo  | C            | 0.047866 | 0.02306  | <b>0.038031</b> | 1663 | Yes     | 0.96675   |
| rs4253311  | 4          | 187411677 | Aldo  | G            | 0.010353 | 0.021797 | 0.635213        | 1787 | Yes     | 0.995957  |

**SHIP**

| SNP-ID     | Chromosome | Position  | Trait | Coded allele | Beta     | SE       | P-value  | N        | Imputed | Oevar_imp |
|------------|------------|-----------|-------|--------------|----------|----------|----------|----------|---------|-----------|
| rs12374220 | 4          | 183677641 | Aldo  | T            | -0.00801 | 0.040005 | 0.841405 | 3124.765 | Yes     | 0.880806  |
| rs5030062  | 3          | 187936874 | Aldo  | C            | 0.003495 | 0.01826  | 0.848189 | 3123.196 | Yes     | 0.956395  |
| rs4253311  | 4          | 187411677 | Aldo  | G            | -0.00705 | 0.017132 | 0.679223 | 3122.162 | Yes     | 0.995835  |

**SUVIMAX**

| SNP-ID     | Chromosome | Position  | Trait | Coded allele | Beta     | SE       | P-value  | N    | Imputed | Oevar_imp |
|------------|------------|-----------|-------|--------------|----------|----------|----------|------|---------|-----------|
| rs12374220 | 4          | 183815796 | Aldo  | T            | -0.08666 | 0.045513 | 0.057082 | 1518 | Yes     | 0.896527  |



|           |   |           |      |   |          |          |          |      |     |          |
|-----------|---|-----------|------|---|----------|----------|----------|------|-----|----------|
| rs5030062 | 3 | 187936882 | Aldo | C | -0.00279 | 0.024193 | 0.908164 | 1518 | No  | 0.999971 |
| rs4253311 | 4 | 187549832 | Aldo | G | -0.02046 | 0.023552 | 0.385029 | 1518 | Yes | 0.98611  |

---

FHS, Framingham Heart Study; KORA, Cooperative Health Research in the Region of Augsburg; SHIP, Study of Health in Pomerania; SUVIMAX, Supplémentation en Vitamines et Minéraux Antioxydants study

SE, standard error; oever\_imp, observed divided by expected variance for imputed allele dosage

**Supplementary Table 3.** Top loci associated with plasma renin activity, stratified by cohort, i. e. in the FHS Generation 3 sample and in the SUVIMAX sample.

| SNP        | chr | coded  | coded  | beta  | beta  | SE   | SE   | P-value  | P-value   | N    | N    |
|------------|-----|--------|--------|-------|-------|------|------|----------|-----------|------|------|
|            |     | allele | allele |       |       |      |      |          |           |      |      |
| rs12374220 | 4   | T      | T      | -0.26 | -0.12 | 0.05 | 0.04 | 3.03E-07 | 0.0044039 | 3757 | 1518 |
| rs5030062  | 3   | C      | C      | 0.11  | 0.05  | 0.02 | 0.02 | 2.70E-08 | 0.0369734 | 3757 | 1518 |
| rs4253311  | 4   | A      | A      | -0.10 | -0.03 | 0.02 | 0.02 | 3.54E-08 | 0.120666  | 3757 | 1518 |

FHS, Framingham Heart Study; SUVIMAX, Supplémentation en Vitamines et Minéraux Antioxydants SNP, single nucleotide polymorphism; Chr, chromosome; SE, standard error

**Supplementary Table 4.** Top loci associated with plasma renin concentration (PRC) in the discovery sample and in the replication sample

| Meta-analysis of the discovery samples (FHS+SHIP+KORA) |       |      |     |      |           |                       |       |
|--------------------------------------------------------|-------|------|-----|------|-----------|-----------------------|-------|
| SNP                                                    | Trait | N    | Chr | MAF  | Direction | P-value               | Locus |
| rs3915911                                              | PRC   | 7971 | 10  | 0.29 | ---       | 8.81x10 <sup>-9</sup> | NEBL  |
| rs3758601                                              | PRC   | 7988 | 10  | 0.40 | ---       | 1.78x10 <sup>-7</sup> | NEBL  |

  

| Replication sample (PREVEND) |             |      |         |         |       |      |         |         |
|------------------------------|-------------|------|---------|---------|-------|------|---------|---------|
| SNP                          | Trait       | N    | Beta    | P-value | Trait | N    | Beta    | P-value |
| rs3915911                    | Aldosterone | 5839 | -0.0069 | 0.402   | PRC   | 6266 | -0.0039 | 0.805   |
| rs3758601                    | Aldosterone | 5855 | 0.0173  | 0.025   | PRC   | 6283 | -0.0076 | 0.602   |

FHS, Framingham Heart Study; KORA, Cooperative Health Research in the Region of Augsburg; SHIP, Study of Health in Pomerania; PREVEND, Prevention of RENal and Vascular ENd-stage Disease; SNP, single nucleotide polymorphism; Chr, chromosome; MAF, minor allele frequency

**Supplementary Table 5.** Top loci associated with circulating aldosterone concentration in the discovery sample and in the replication sample

| Meta-analysis of the discovery samples<br>(FHS+SHIP+KORA+SUVIMAX) |             |       |     |      |           |                       |                |
|-------------------------------------------------------------------|-------------|-------|-----|------|-----------|-----------------------|----------------|
| SNP                                                               | Trait       | N     | Chr | MAF  | Direction | P-value               | Locus          |
| rs6986428                                                         | Aldosterone | 13176 | 8   | 0.06 | ++++      | 4.01x10 <sup>-6</sup> | <i>C8orf22</i> |
| rs8597                                                            | Aldosterone | 13291 | 7   | 0.07 | ++++      | 4.20x10 <sup>-6</sup> | <i>CALU</i>    |
| rs7917400*                                                        | Aldosterone | 4909  | 10  | 0.41 | ?--?      | 5.05x10 <sup>-6</sup> | <i>CUBN</i>    |
| rs6884962                                                         | Aldosterone | 13315 | 5   | 0.32 | ++++      | 5.36x10 <sup>-6</sup> | <i>NKX2-5</i>  |

  

| Replication sample (PREVEND) |             |      |         |       |       |      |         |      |
|------------------------------|-------------|------|---------|-------|-------|------|---------|------|
| SNP                          | Trait       | N    | Beta    | P     | Trait | N    | Beta    | P    |
| rs6986428                    | Aldosterone | 5881 | -0.0002 | 0.992 | PRC   | 6312 | -0.0068 | 0.88 |
| rs8597                       | Aldosterone | 5870 | -0.013  | 0.394 | PRC   | 6296 | -0.052  | 0.07 |
| rs7917400                    | Aldosterone | 5866 | -0.006  | 0.432 | PRC   | 6294 | 0.0016  | 0.91 |
| rs6884962                    | Aldosterone | 5832 | 0.0142  | 0.072 | PRC   | 6260 | 0.014   | 0.35 |

\*This SNP was available only in KORA and SHIP. FHS, Framingham Heart Study; KORA, Cooperative Health Research in the Region of Augsburg; SHIP, Study of Health in Pomerania; SUVIMAX, Supplémentation en Vitamines et Minéraux Antioxydants; PREVEND, Prevention of RENal and Vascular ENd-stage Disease; SNP, single nucleotide polymorphism; Chr, chromosome; MAF, minor allele frequency

**Supplementary Table 6a.** Association of genetic variation at the renin (*REN*) locus with plasma renin activity (PRA)

| SNP        | Chr | MAF   | Direction | P-value |
|------------|-----|-------|-----------|---------|
| rs11571079 | 1   | 0.063 | ++        | 0.18    |
| rs11571078 | 1   | 0.130 | +-        | 0.33    |
| rs1464816  | 1   | 0.381 | ++        | 0.33    |
| rs10900555 | 1   | 0.357 | +-        | 0.38    |
| rs11240688 | 1   | 0.187 | --        | 0.43    |
| rs6676670  | 1   | 0.187 | --        | 0.43    |
| rs6693954  | 1   | 0.262 | ++        | 0.58    |
| rs2368564  | 1   | 0.271 | ++        | 0.62    |
| rs11571082 | 1   | 0.132 | -+        | 0.72    |
| rs3795575  | 1   | 0.140 | -+        | 0.72    |
| rs5705     | 1   | 0.132 | +-        | 0.73    |
| rs7521667  | 1   | 0.139 | -+        | 0.73    |
| rs2887284  | 1   | 0.208 | --        | 0.85    |

SNP, single nucleotide polymorphism; Chr, chromosome; MAF, minor allele frequency

**Supplementary Table 6b.** Association of genetic variation at the renin (*REN*) locus with plasma renin concentration (PRC)

| SNP        | Chr | MAF   | Direction | P-value |
|------------|-----|-------|-----------|---------|
| rs2368564  | 1   | 0.271 | --+       | 0.14    |
| rs11571078 | 1   | 0.135 | +++       | 0.16    |
| rs2887284  | 1   | 0.207 | -?+       | 0.19    |
| rs6693954  | 1   | 0.266 | --+       | 0.24    |
| rs1464816  | 1   | 0.358 | +--       | 0.30    |
| rs10900555 | 1   | 0.343 | ++-       | 0.55    |
| rs11240688 | 1   | 0.177 | -+-       | 0.58    |
| rs6676670  | 1   | 0.176 | -+-       | 0.65    |
| rs11571079 | 1   | 0.058 | --+       | 0.68    |
| rs7521667  | 1   | 0.133 | --+       | 0.75    |
| rs3795575  | 1   | 0.137 | --+       | 0.85    |
| rs5705     | 1   | 0.131 | ++-       | 0.93    |
| rs11571082 | 1   | 0.131 | --+       | 0.97    |

SNP, single nucleotide polymorphism; Chr, chromosome; MAF, minor allele frequency

**Supplementary Table 6c.** Association of genetic variation at the *CYP11B2* locus with circulating aldosterone levels

| SNP        | Chr | MAF   | Direction | P-value |
|------------|-----|-------|-----------|---------|
| rs4543     | 8   | 0.086 | ++++      | 0.15    |
| rs6433     | 8   | 0.427 | +---      | 0.57    |
| rs6414     | 8   | 0.450 | +---      | 0.63    |
| rs11781816 | 8   | 0.426 | -+++      | 0.66    |
| rs4536     | 8   | 0.027 | -+--      | 0.67    |
| rs4545     | 8   | 0.018 | -+++      | 0.78    |
| rs3097     | 8   | 0.294 | -+++      | 0.79    |

SNP, single nucleotide polymorphism; Chr, chromosome; MAF, minor allele frequency

**Supplementary Figures**

**Supplementary Figure 1.** The quantile-quantile plot for plasma renin activity in the FHS Generation 3 sample only

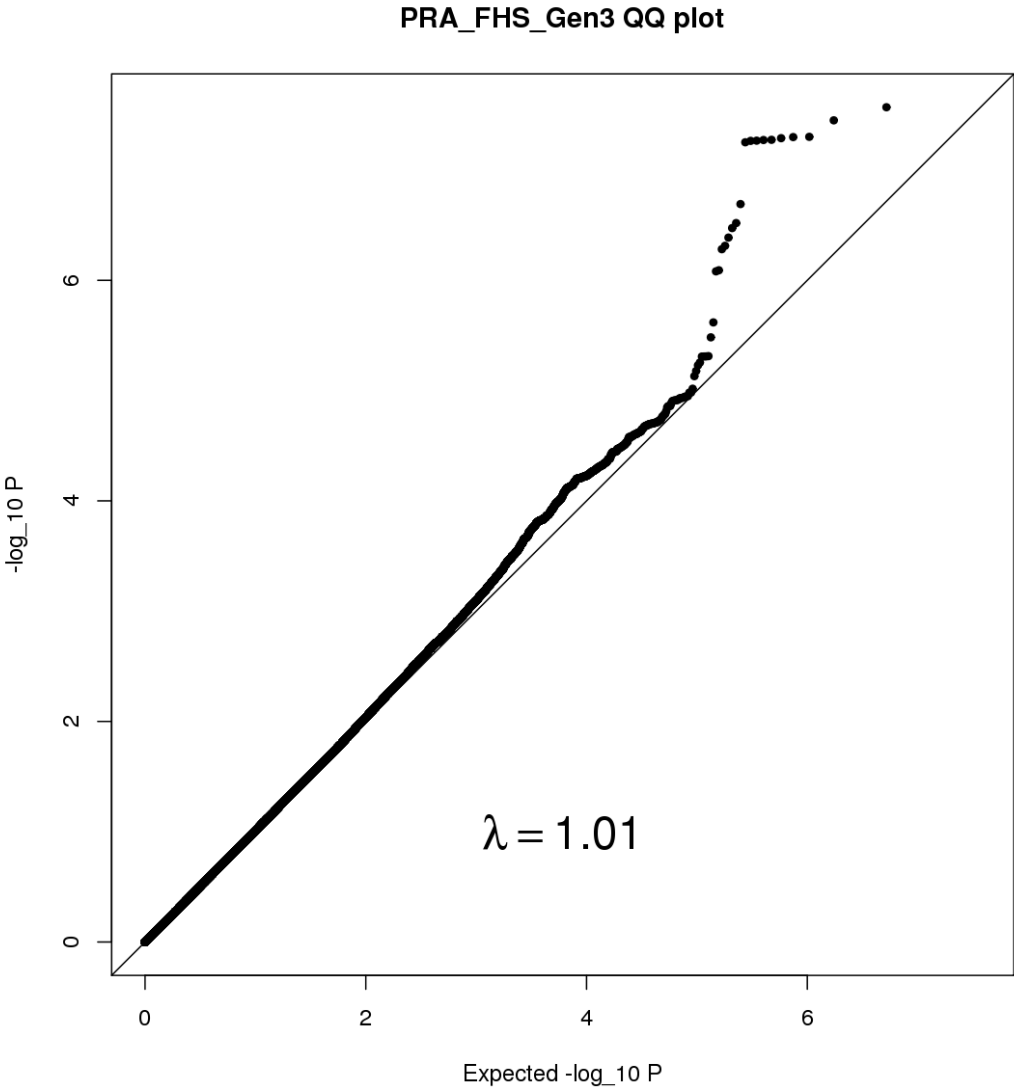



**Supplementary Figure 2.** Regional plot of rs4253311 in exon 11 of the *kallikrein B* gene (**Panel A**) and of rs5030062 in intron 6 of the *kininogen 1* gene (**Panel B**); based on imputation to the 1000 genome dataset

**Panel A**

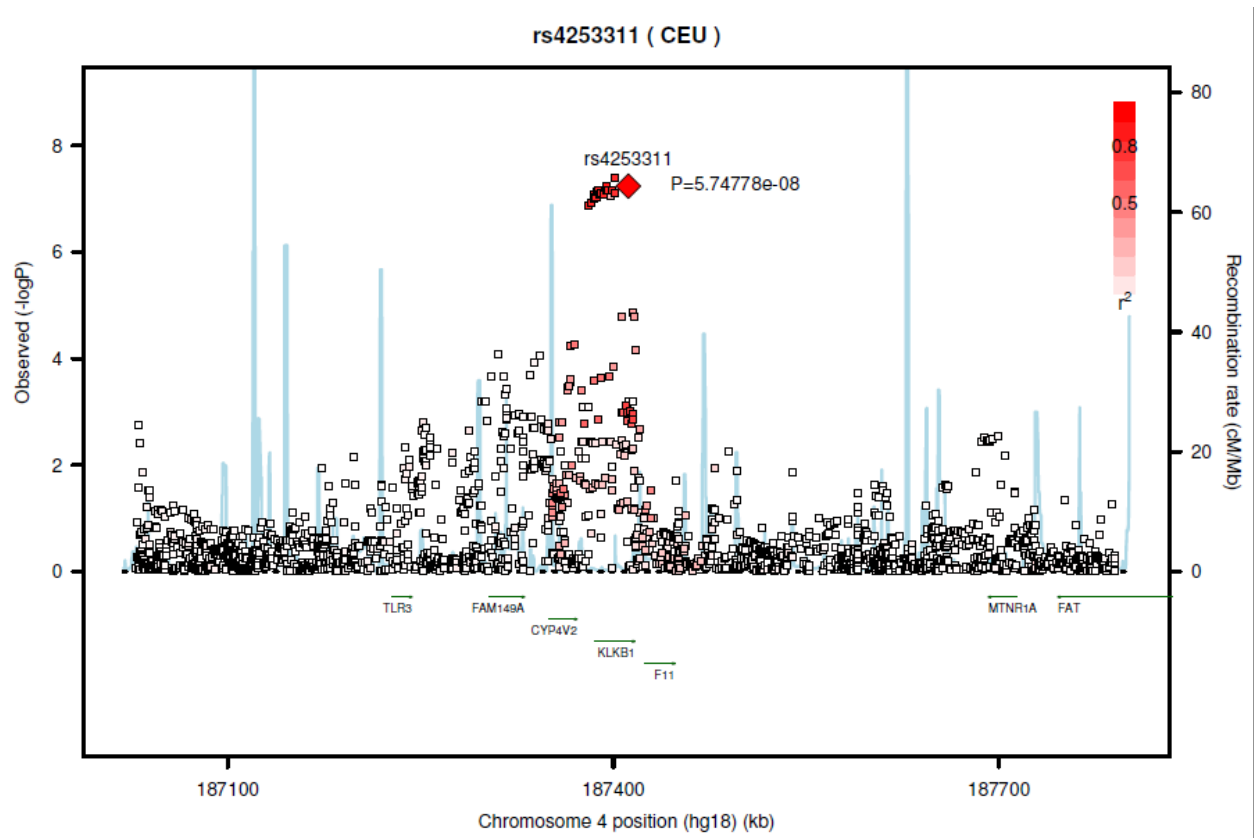

Panel B

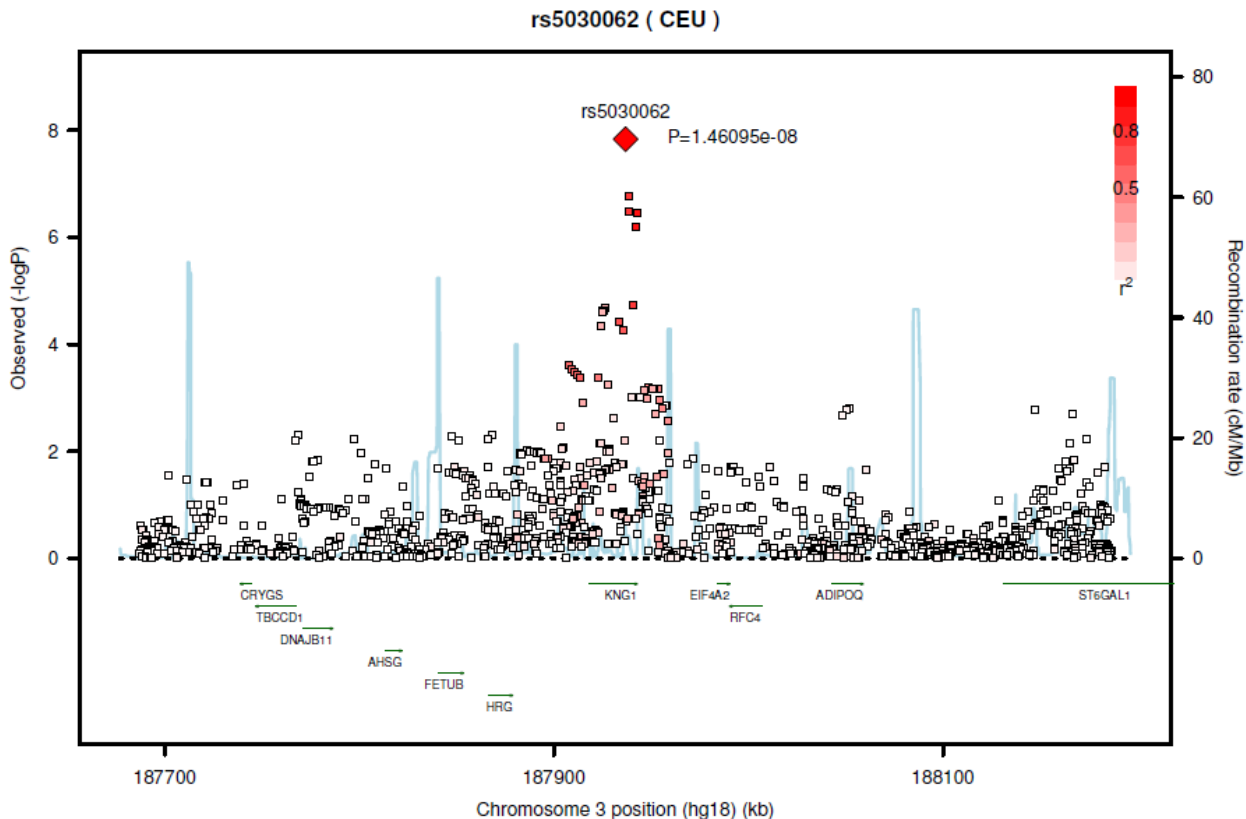

**Supplementary Figure 3.** Plasma renin activity by rs5030062 genotype (**Panel A**) and by rs4253311 genotype (**Panel B**)

**Panel A**

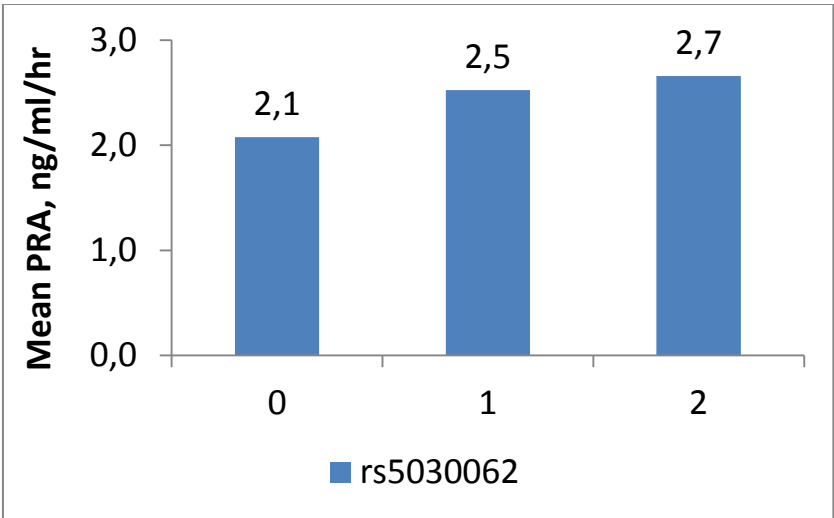

**Panel B**

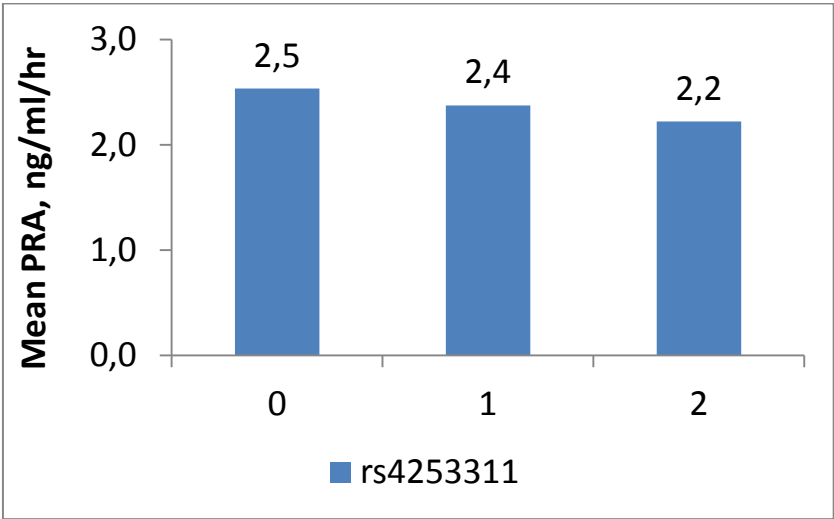

**Supplementary Figure 4.** Manhattan plot (**Panel A**) and quantile-quantile plot (**Panel B**) of the genome-wide analysis for plasma renin concentration

**Panel A**

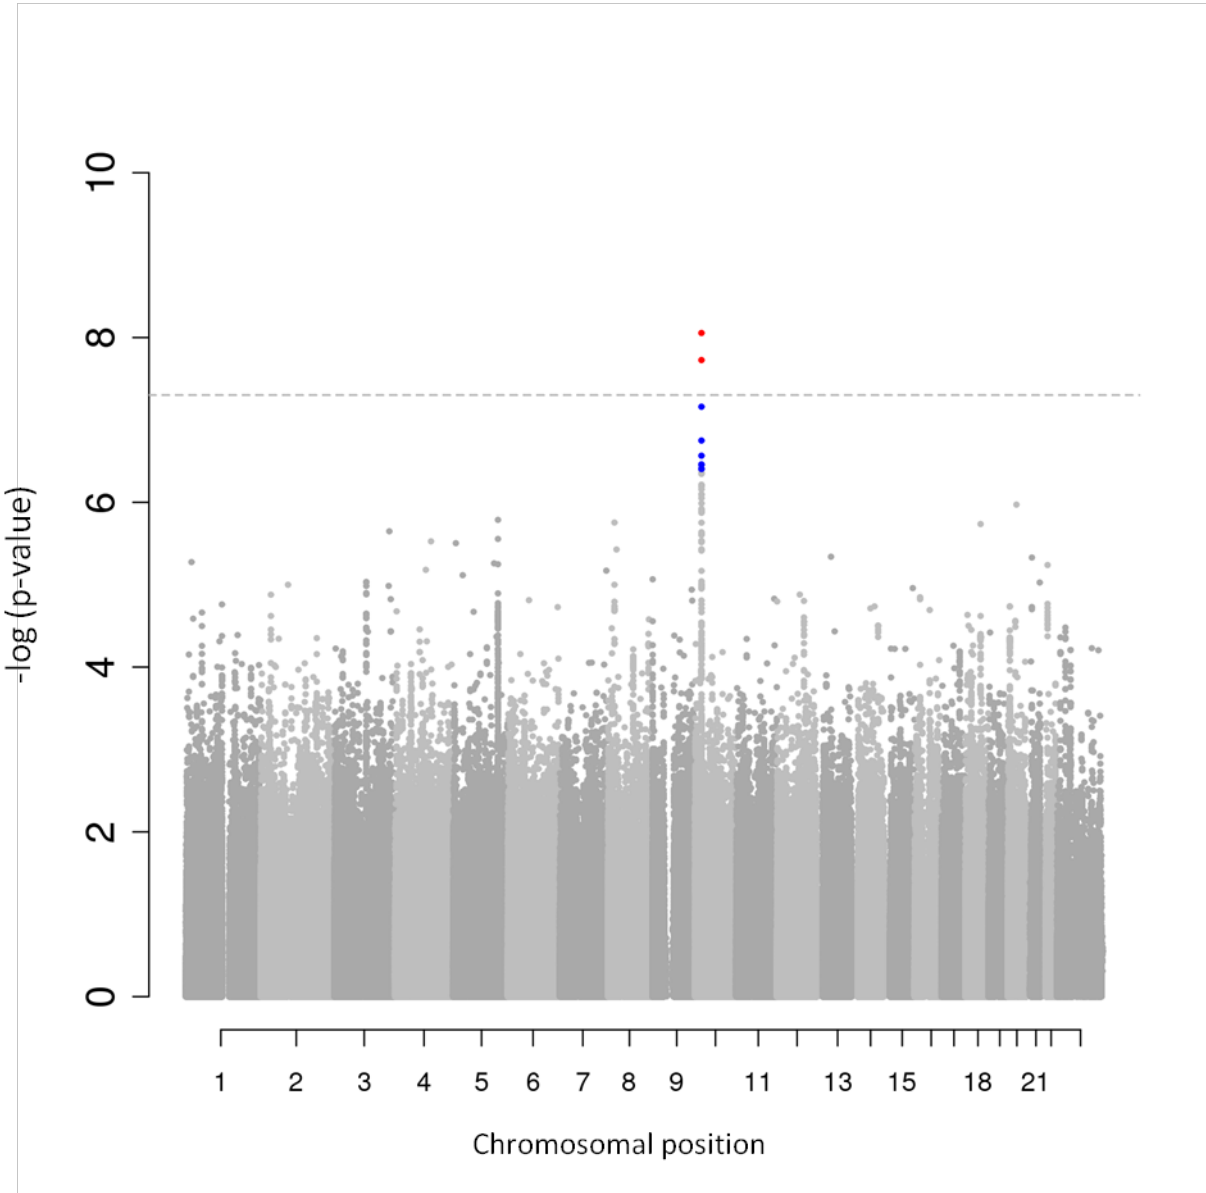

Panel B

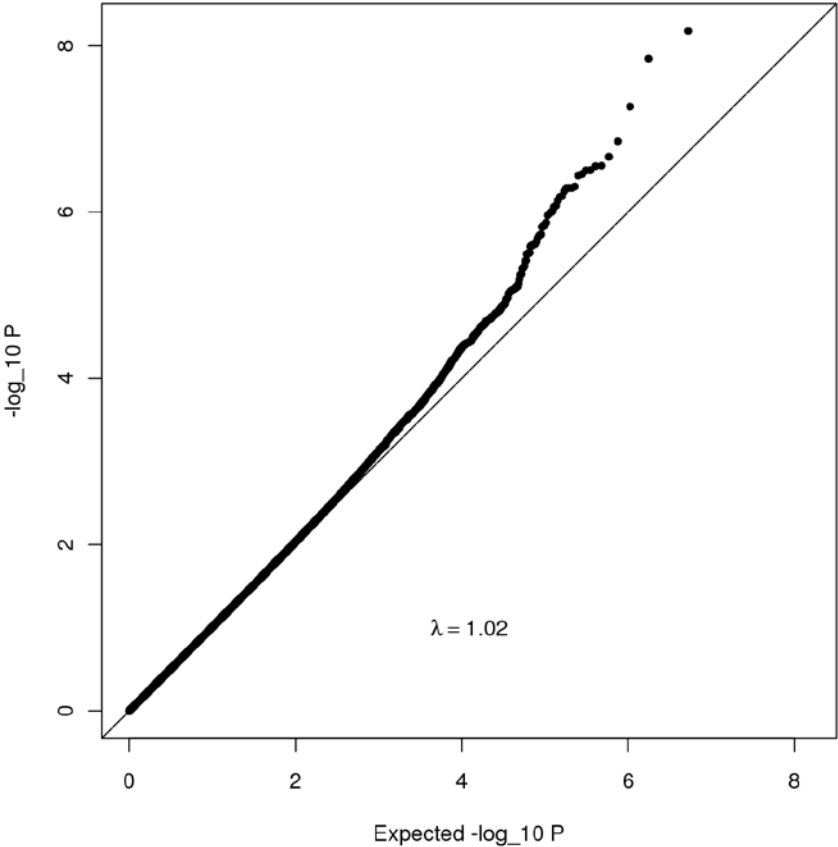

**Supplementary Figure 5.** Manhattan plot (**Panel A**) and quantile-quantile plot (**Panel B**) of the genome-wide analysis for circulating aldosterone concentration

**Panel A**

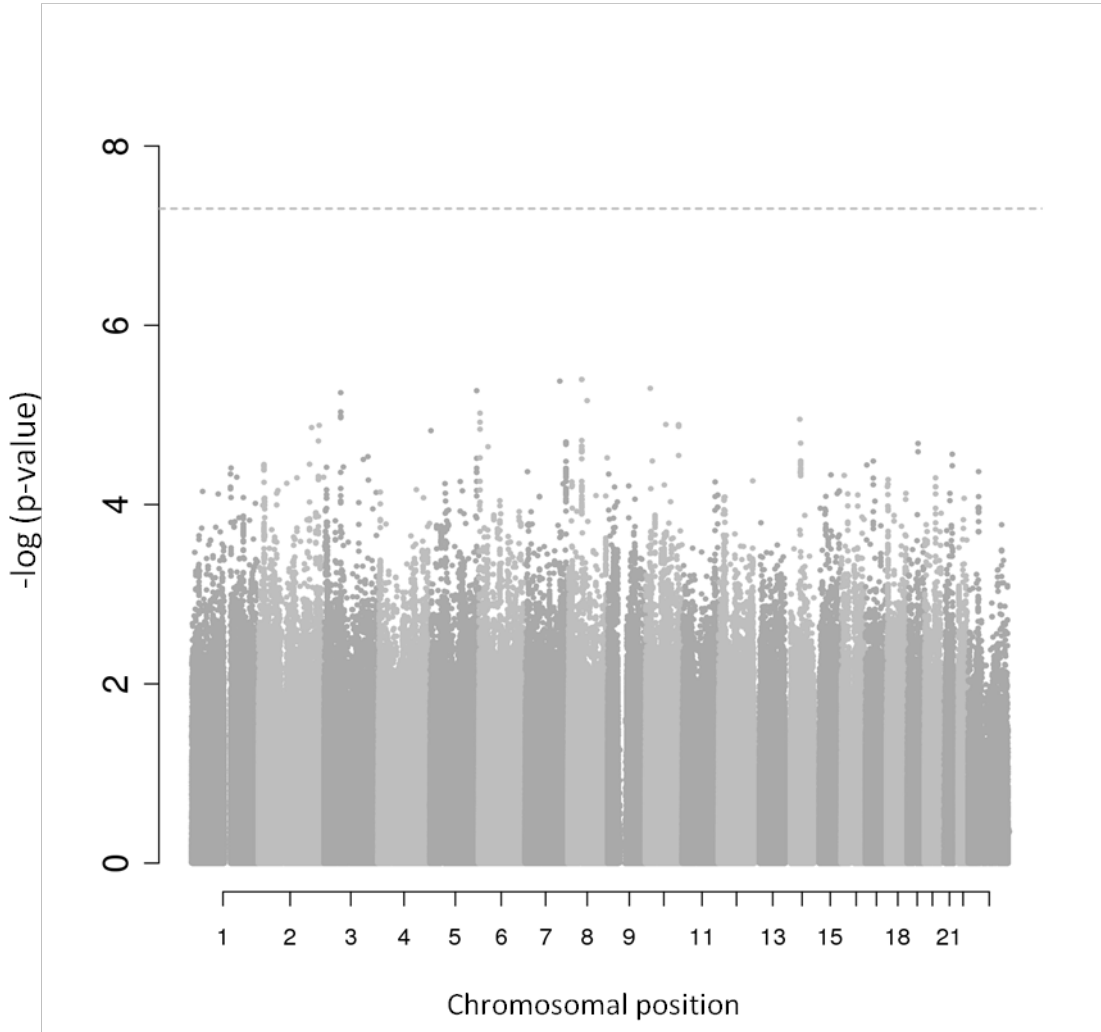

Panel B

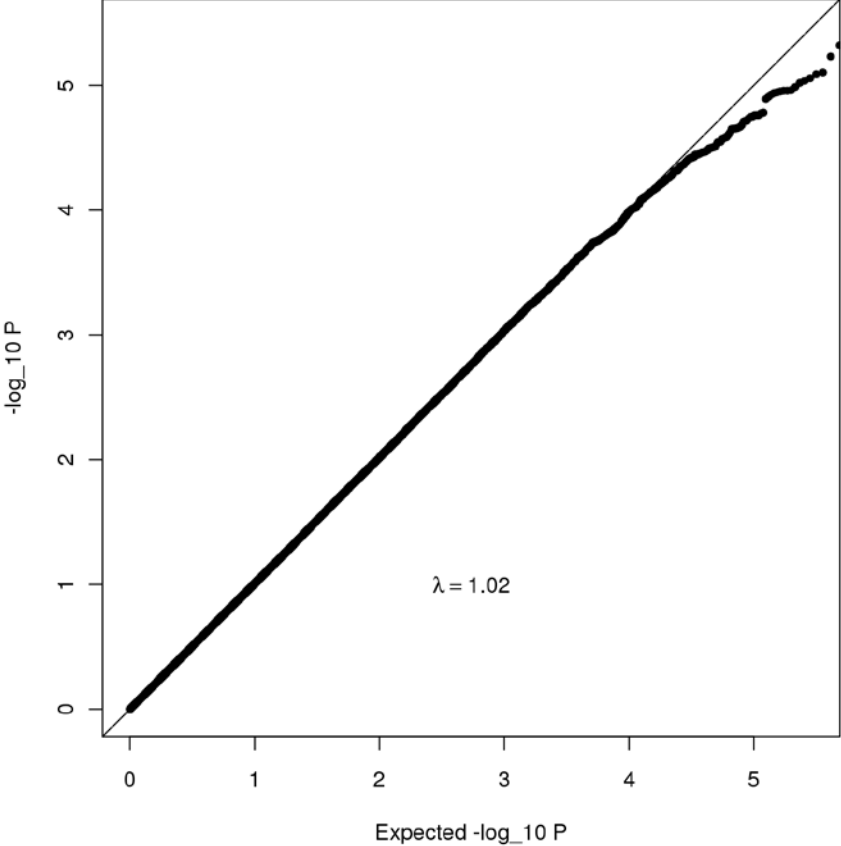

## References

1. Lieb W, Larson MG, Benjamin EJ, Yin X, Tofler GH, Selhub J, et al. Multimarker approach to evaluate correlates of vascular stiffness: The framingham heart study. *Circulation*. 2009;119:37-43.
2. O'Seaghda CM, Hwang SJ, Vasan RS, Larson MG, Hoffmann U, Wang TJ, et al. Correlation of renin angiotensin and aldosterone system activity with subcutaneous and visceral adiposity: The framingham heart study. *BMC endocrine disorders*. 2012;12:3.
3. Manolopoulou J, Bielohuby M, Caton SJ, Gomez-Sanchez CE, Renner-Mueller I, Wolf E, et al. A highly sensitive immunofluorometric assay for the measurement of aldosterone in small sample volumes: Validation in mouse serum. *J Endocrinol*. 2008;196:215-224.
4. Hannemann A, Meisinger C, Bidlingmaier M, Doring A, Thorand B, Heier M, et al. Association of plasma aldosterone with the metabolic syndrome in two german populations. *Eur J Endocrinol*. 2011;164:751-758.
5. Morganti A. A comparative study on inter and intralaboratory reproducibility of renin measurement with a conventional enzymatic method and a new chemiluminescent assay of immunoreactive renin. *J Hypertens*. 2010;28:1307-1312.
6. Hafner S, Baumert J, Emeny RT, Lacruz ME, Bidlingmaier M, Reincke M, et al. Hypertension and depressed symptomatology: A cluster related to the activation of the renin-angiotensin-aldosterone system (raas). Findings from population based kora f4 study. *Psychoneuroendocrinology*. 2013;38:2065-2074.
7. Hannemann A, Friedrich N, Ludemann J, Volzke H, Rettig R, Peters J, et al. Reference intervals for aldosterone, renin, and the aldosterone-to-renin ratio in the population-based study of health in pomerania (ship-1). *Hormone and metabolic research = Hormon- und Stoffwechselforschung = Hormones et metabolisme*. 2010;42:392-399.



8. Menard J, Guyenne TT, Corvol P, Pau B, Simon D, Roncucci R. Direct immunometric assay of active renin in human plasma. *J Hypertens Suppl.* 1985;3:S275-278.
9. de Boer RA, Schrotten NF, Bakker SJ, Mahmud H, Szymanski MK, van der Harst P, et al. Plasma renin and outcome in the community: Data from prevend. *Eur Heart J.* 2012;33:2351-2359.
