# Supplementary material
Source: PubMed Central journal article supplement (PMC4354880)

**Von:** [Jaya Ramkumar](#)  
**An:** [hhlin@bu.edu](mailto:hhlin@bu.edu)  
**Cc:** [Lieb, Wolfgang](#)  
**Thema:** Permission to publish with copyrighted IPA figures  
**Datum:** Dienstag, 18. März 2014 16:30:33

---

Dear Dr. Lin,

Thank you for contacting Ingenuity Systems customer support. Below is a letter you may submit with your manuscript giving you permission to use copyrighted IPA images in your paper.

Please refer to the IPA Citation guidelines in the on-line help manual to properly cite IPA.

Please let us know if you have any further questions or need any more assistance with your publication.

Best regards,

Ingenuity Customer Support  
-----

To whom this may concern:

Dr. Lin has been granted permission by Ingenuity Systems, Inc. to use copyrighted figures generated from Ingenuity Pathways Analysis in his/her publication.

If you have any further questions, please contact Ingenuity Customer Support at [support@ingenuity.com](mailto:support@ingenuity.com).

Best regards,

Jaya Ramkumar, M.S  
Senior Support Scientist, Support Lead

---

INGENUITY SYSTEMS | [www.ingenuity.com](http://www.ingenuity.com)  
1700 Seaport Blvd., 3rd Floor | Redwood City, CA 94063  
650.381.5111– ph

---

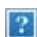

Supplement: NIHMS648856-supplement-3.pdf [file NIHMS648856-supplement-3.pdf]
